# Supplementary material for: Global patterns and drivers of phosphorus pools in natural soils
Source: Copernicus journal article supplement (doi:10.5194/bg-2023-22), 2023-02-24

**Supplementary Information for**

**Global patterns and drivers of phosphorus pools in natural soils**

Xianjin He<sup>1</sup>; Laurent Augusto<sup>2</sup>; Daniel S. Goll<sup>3</sup>; Bruno Ringeval<sup>2</sup>; Ying-Ping Wang<sup>4</sup>; Julian Helfenstein<sup>5,6</sup>; Yuanyuan Huang<sup>4</sup>; Enqing Hou<sup>7</sup>

1 Key Laboratory of the Three Gorges Reservoir Region's Eco-Environment, Ministry of Education, Chongqing University, Chongqing, China

2 ISPA, Bordeaux Sciences Agro, INRAE, F-33140, Villenave d'Ornon, France

3 Université Paris Saclay, CEA-CNRS-UVSQ, LSCE/IPSL, Gif sur Yvette, France

4 CSIRO Oceans and Atmosphere, Aspendale, Vic., Australia

5 Agroscope, 8046 Zürich, Switzerland

6 Soil Geography and Landscape Group, Wageningen University, 6700 AA Wageningen, The Netherlands

7 Key Laboratory of Vegetation Restoration and Management of Degraded Ecosystems, South China Botanical Garden, Chinese Academy of Sciences, Guangzhou, China

*Corresponding to:* Daniel S. Goll ([dsgoll123@gmail.com](mailto:dsgoll123@gmail.com)); Enqing Hou ([hoeq@scbg.ac.cn](mailto:hoeq@scbg.ac.cn)).

Table S1. Gridded data

| Group      | Variables                 | Brief description                                 | Original resolution | Data source                                                                                             |
|------------|---------------------------|---------------------------------------------------|---------------------|---------------------------------------------------------------------------------------------------------|
| Climate    | Mean annual temperature   | 30-yr (1981 to 2010) annual average temperature   | 1 km                | <a href="http://worldclim.org/bioclim">http://worldclim.org/bioclim</a>                                 |
|            | Mean annual precipitation | 30-yr (1981 to 2010) annual average precipitation | 1 km                | <a href="http://worldclim.org/bioclim">http://worldclim.org/bioclim</a>                                 |
|            | Biomes                    | Potential Biomes                                  | 1 km                | <a href="https://sedac.ciesin.columbia.edu">https://sedac.ciesin.columbia.edu</a>                       |
| Soil       | Total soil phosphorus     | Total soil phosphorus concentration               | 50 km               | <a href="https://doi.org/10.6084/m9.figshare.14583375">https://doi.org/10.6084/m9.figshare.14583375</a> |
|            | Soil organic carbon       | Soil organic carbon concentration                 | 250 m               | <a href="https://openlandmap.org">https://openlandmap.org</a>                                           |
|            | Soil pH                   | Soil pH                                           | 250 m               | <a href="https://openlandmap.org">https://openlandmap.org</a>                                           |
|            | Soil clay                 | Soil clay content                                 | 250 m               | <a href="https://openlandmap.org">https://openlandmap.org</a>                                           |
|            | Soil sand                 | Soil sand content                                 | 250 m               | <a href="https://openlandmap.org">https://openlandmap.org</a>                                           |
|            | Soil order                | Taxonomy soil order class                         | 250 m               | <a href="https://openlandmap.org">https://openlandmap.org</a>                                           |
|            | Soil depth                | Soil depth                                        | 10 km               | <a href="http://globalchange.bnu.edu.cn/research/data">http://globalchange.bnu.edu.cn/research/data</a> |
| Topography | Elevation                 | Land surface elevation                            | 250 m               | <a href="https://openlandmap.org">https://openlandmap.org</a>                                           |

20 **Table S2. Representativeness of the soil P pool concentrations database.**

|                    | Global distribution | Our database |
|--------------------|---------------------|--------------|
| <b>Soil orders</b> |                     |              |
| Alfisols           | 9.90%               | 11.74%       |
| Andisols           | 0.70%               | 3.07%        |
| Aridisols          | 11.10%              | 4.63%        |
| Entisols           | 15.60%              | 10.07%       |
| Gelisols           | 18.40%              | 0.75%        |
| Histosols          | 1.40%               | 3.77%        |
| Inceptisols        | 16.30%              | 26.33%       |
| Mollisols          | 7.40%               | 5.71%        |
| Oxisols            | 5.80%               | 12.06%       |
| Spodosols          | 4.90%               | 7.32%        |
| Ultisols           | 6.60%               | 9.21%        |
| Vertisols          | 2.00%               | 5.33%        |
| <b>Biomes</b>      |                     |              |
| Boreal forest      | 22.00%              | 4.82%        |
| Desert             | 5.19%               | 3.04%        |
| Grassland          | 22.32%              | 10.41%       |
| Savanna            | 12.10%              | 10.51%       |
| Temperate forest   | 17.62%              | 53.39%       |
| Tropical forest    | 10.09%              | 10.14%       |
| Tundra             | 10.67%              | 7.70%        |

21 Global data: USDA for soils order, and Hengl et al.'s potential biomes (2012) for biome. Global data were recalculated for a  
22 sum of 100%.

23

24 **Table S3 Area-weighted average P pool concentrations and proportions in soils of different weathering stages.** Results  
 25 based on the global estimates for depths of 0-30 cm.

| Weathering stage                          | Labile Pi | Labile Po | Moderately labile Pi | Moderately labile Po | Primary P | Occluded P |
|-------------------------------------------|-----------|-----------|----------------------|----------------------|-----------|------------|
| <i>Concentration (mg kg<sup>-1</sup>)</i> |           |           |                      |                      |           |            |
| Slight                                    | 40.0      | 39.5      | 70.4                 | 167.3                | 116.6     | 228.3      |
| Intermediate                              | 29.1      | 24.9      | 42.6                 | 88.1                 | 123.7     | 197.9      |
| Strong                                    | 28.5      | 31.3      | 47.7                 | 103.3                | 54.8      | 198.0      |
| <i>Proportion of total P (%)</i>          |           |           |                      |                      |           |            |
| Slight                                    | 6.0       | 5.9       | 10.2                 | 23.3                 | 18.2      | 36.4       |
| Intermediate                              | 5.7       | 4.9       | 8.4                  | 17.0                 | 24.0      | 39.9       |
| Strong                                    | 6.1       | 6.7       | 10.3                 | 21.2                 | 11.4      | 44.4       |

26  
 27

28 **Table S4 Area-weighted average P pool concentrations and proportions in different biomes.** Results based on the global  
29 estimates at depths of 0-30 cm.

| Biome                                     | Labile Pi | Labile Po | Moderately labile Pi | Moderately labile Po | Primary P | Occluded P |
|-------------------------------------------|-----------|-----------|----------------------|----------------------|-----------|------------|
| <i>Concentration (mg kg<sup>-1</sup>)</i> |           |           |                      |                      |           |            |
| Tundra                                    | 54.9      | 54.9      | 102.1                | 251.5                | 141.5     | 260.2      |
| Boreal forest                             | 53.6      | 55.2      | 98.6                 | 256.2                | 102.7     | 251.0      |
| Temperate forest                          | 33.8      | 32.4      | 53.2                 | 116.7                | 87.9      | 211.1      |
| Tropical forest                           | 25.0      | 27.2      | 40.0                 | 83.7                 | 63.5      | 204.3      |
| Savanna                                   | 24.5      | 22.2      | 38.9                 | 74.9                 | 88.1      | 189.2      |
| Grassland                                 | 27.4      | 20.0      | 34.5                 | 70.3                 | 165.3     | 185.7      |
| Desert                                    | 27.7      | 22.5      | 31.6                 | 58.5                 | 214.7     | 171.3      |
| <i>Proportion of total P (%)</i>          |           |           |                      |                      |           |            |
| Tundra                                    | 6.3       | 6.3       | 11.8                 | 29.1                 | 16.4      | 30.1       |
| Boreal forest                             | 6.6       | 6.8       | 12.1                 | 31.3                 | 12.6      | 30.7       |
| Temperate forest                          | 6.3       | 6.5       | 9.3                  | 20.9                 | 21.7      | 35.4       |
| Tropical forest                           | 5.6       | 6.1       | 9.0                  | 18.9                 | 14.3      | 46.0       |
| Savanna                                   | 5.6       | 5.1       | 8.9                  | 17.1                 | 20.1      | 43.2       |
| Grassland                                 | 5.4       | 4.0       | 6.9                  | 14.0                 | 32.8      | 36.9       |
| Desert                                    | 5.3       | 4.3       | 6.0                  | 11.1                 | 40.8      | 32.5       |

33 **Table S5. Comparison of P pool concentrations between our estimates and estimates by Yang *et al.* (2013).**

|               | Labile Pi | Organic P | Moderately labile<br>Pi | Primary P | Occluded P |
|---------------|-----------|-----------|-------------------------|-----------|------------|
| <b>Median</b> |           |           |                         |           |            |
| He            | 29.9      | 157.6     | 46.1                    | 95.6      | 215.8      |
| Yang          | 27.9      | 69.4      | 26.8                    | 89.1      | 104.0      |
| <b>Mean</b>   |           |           |                         |           |            |
| He            | 34.4      | 195.2     | 62.9                    | 111.2     | 213.3      |
| Yang          | 33.5      | 85.4      | 30.6                    | 117.5     | 115.6      |

34  
35

36 **Figure S1. Comparison of site-level Hedley P pool measurement distributions between our database and Yang et al.'s**  
37 **(2013).** Our database (A) contains 1838 observations, while Yang et al. (2013) (B) contains 178.

A

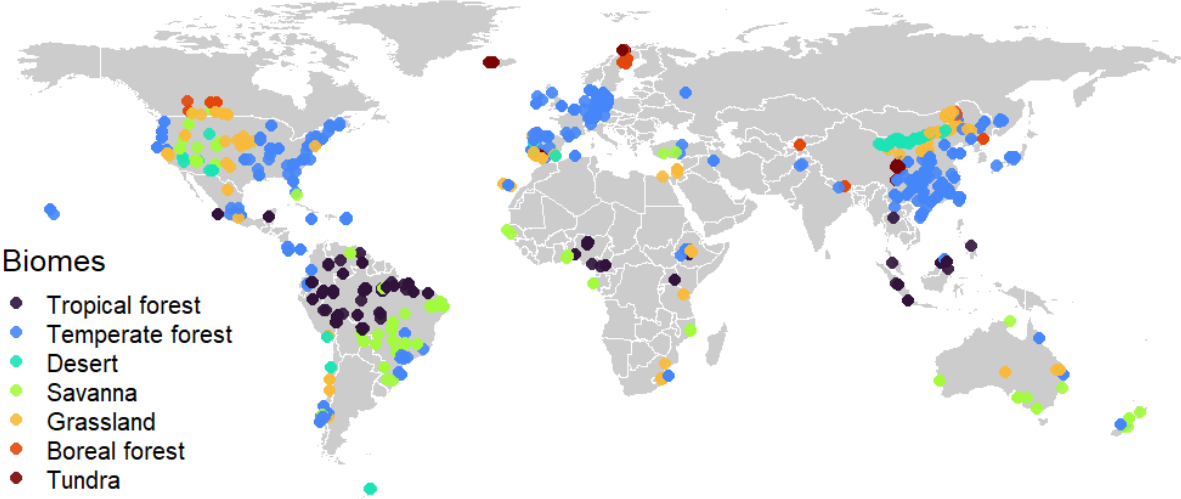

B

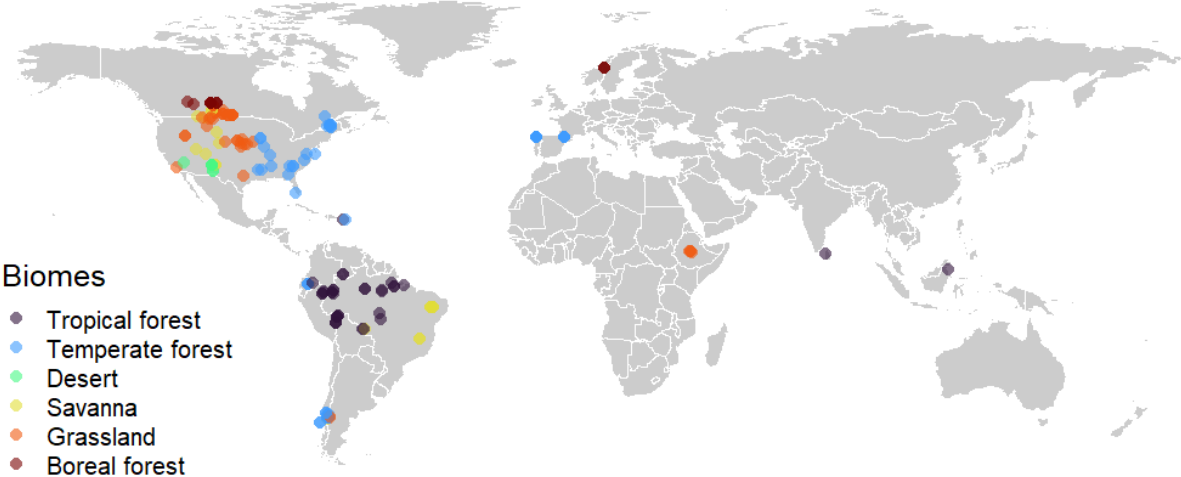

39 **Figure S2. PRISMA flow diagram showing the procedure used for selection of studies for synthesis.**  
40

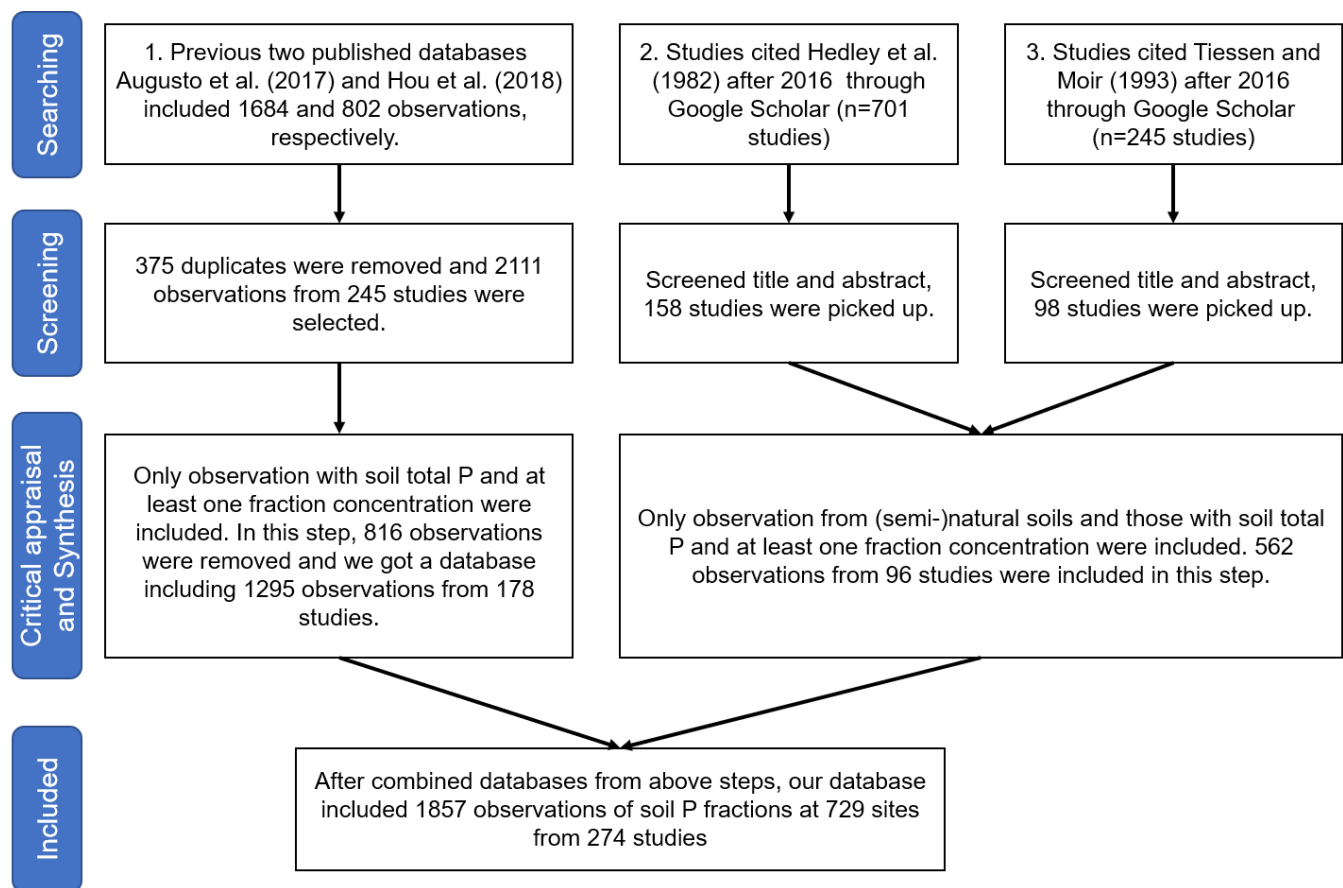

41  
42



43 **Figure S3. Flow chart of soil P fractionation.** The flow chart follows the procedures outlined by Hedley et al. (1982) and  
 44 Tiessen and Moir (1993). Redrawn according to Hou et al. (2018).

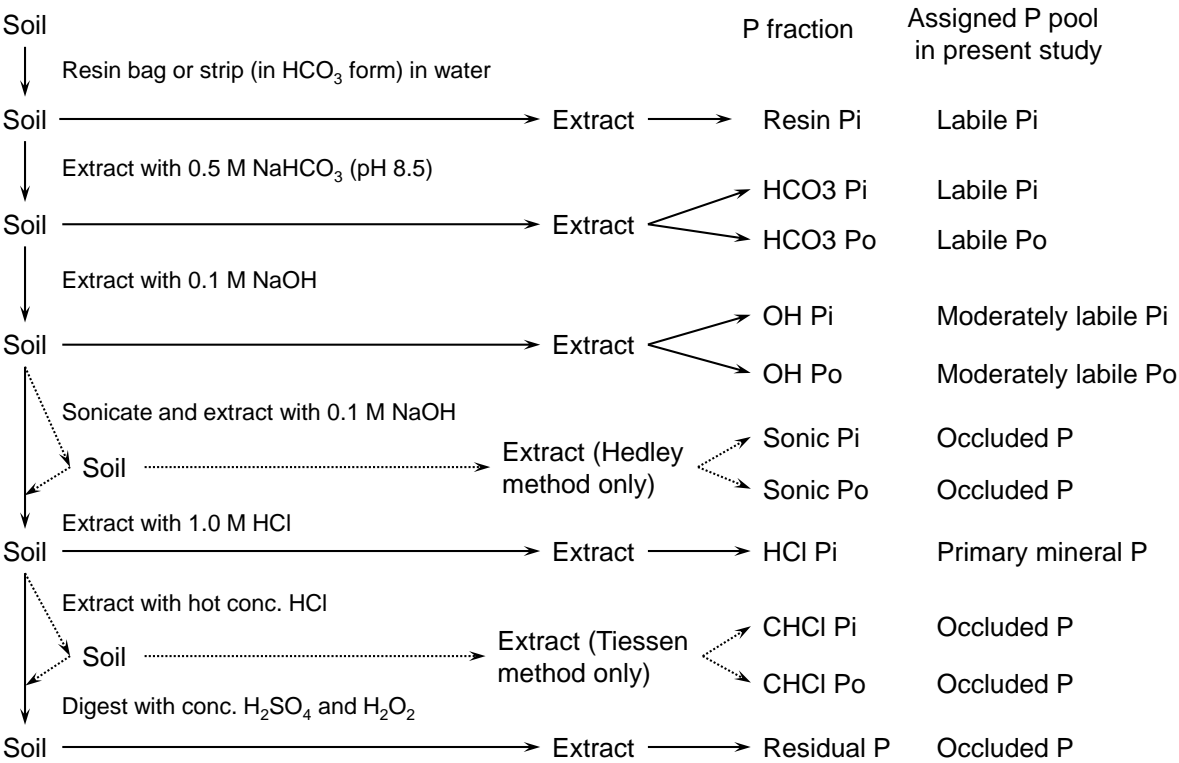

47 **Figure S4. Average P pool concentrations and proportions of total P concentration across weathering stage and biome.**  
 48 Labile Po and moderately labile Po are combined into the organic pool. Results based on 1857 observations.

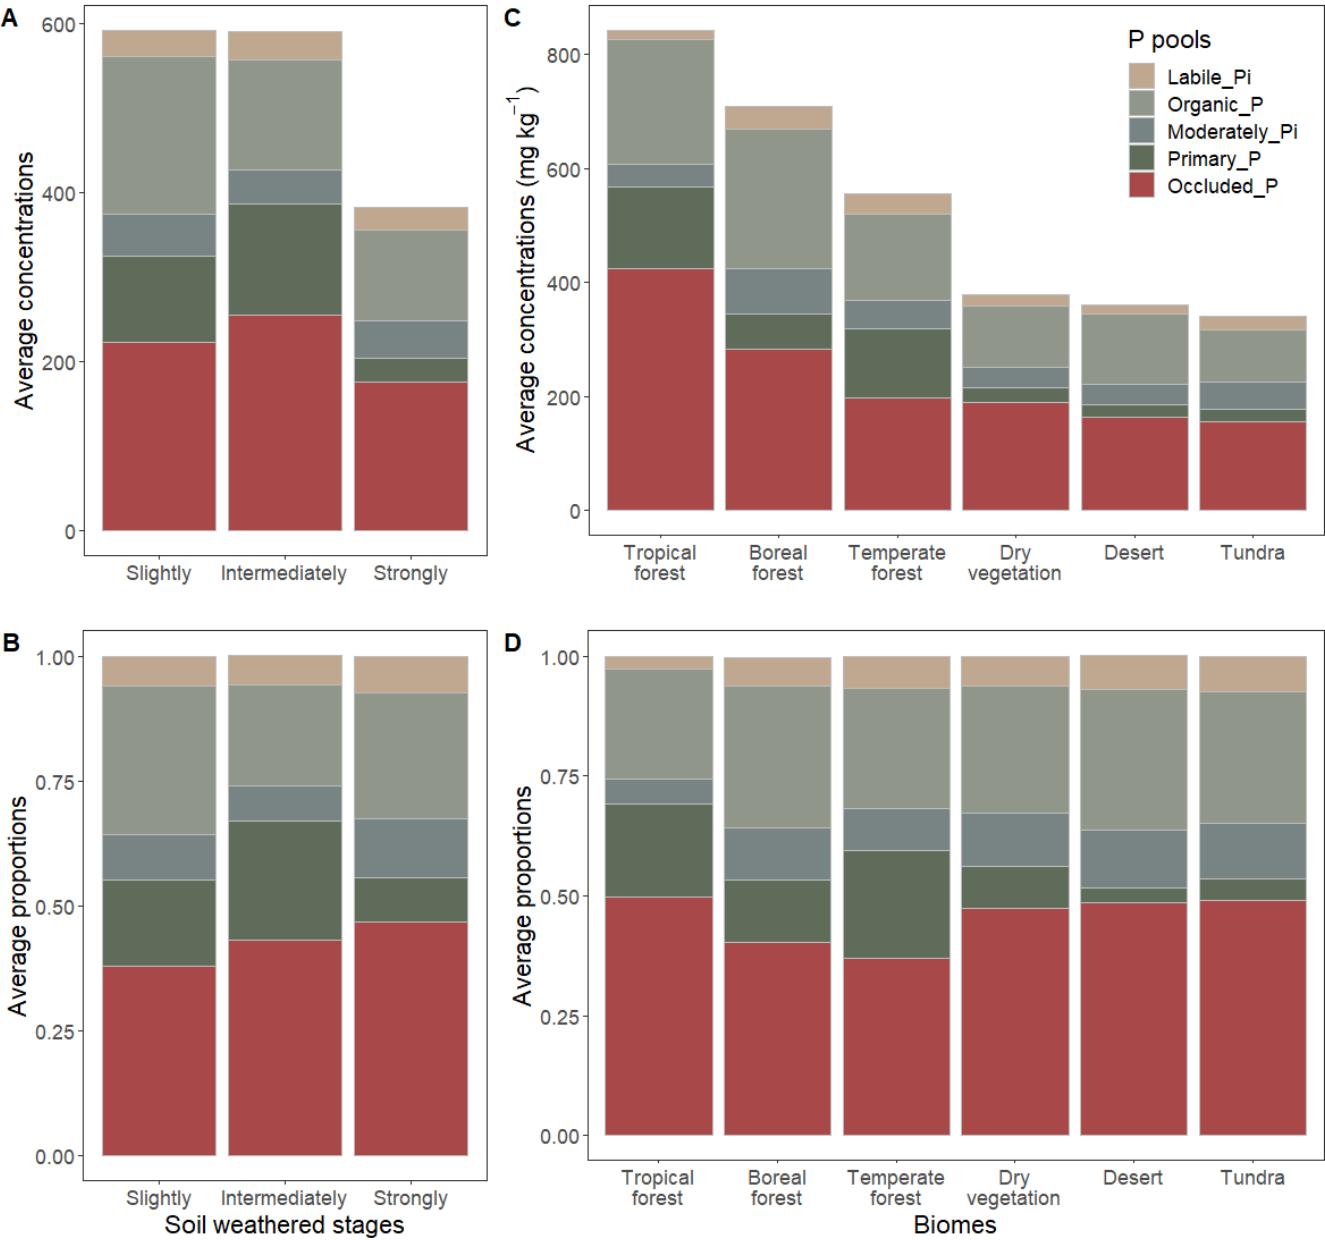

51

52

53

**Figure S5. Histogram plots of different P pool concentrations.** We only included values falling in the interval between 1% and 99% in these plots.

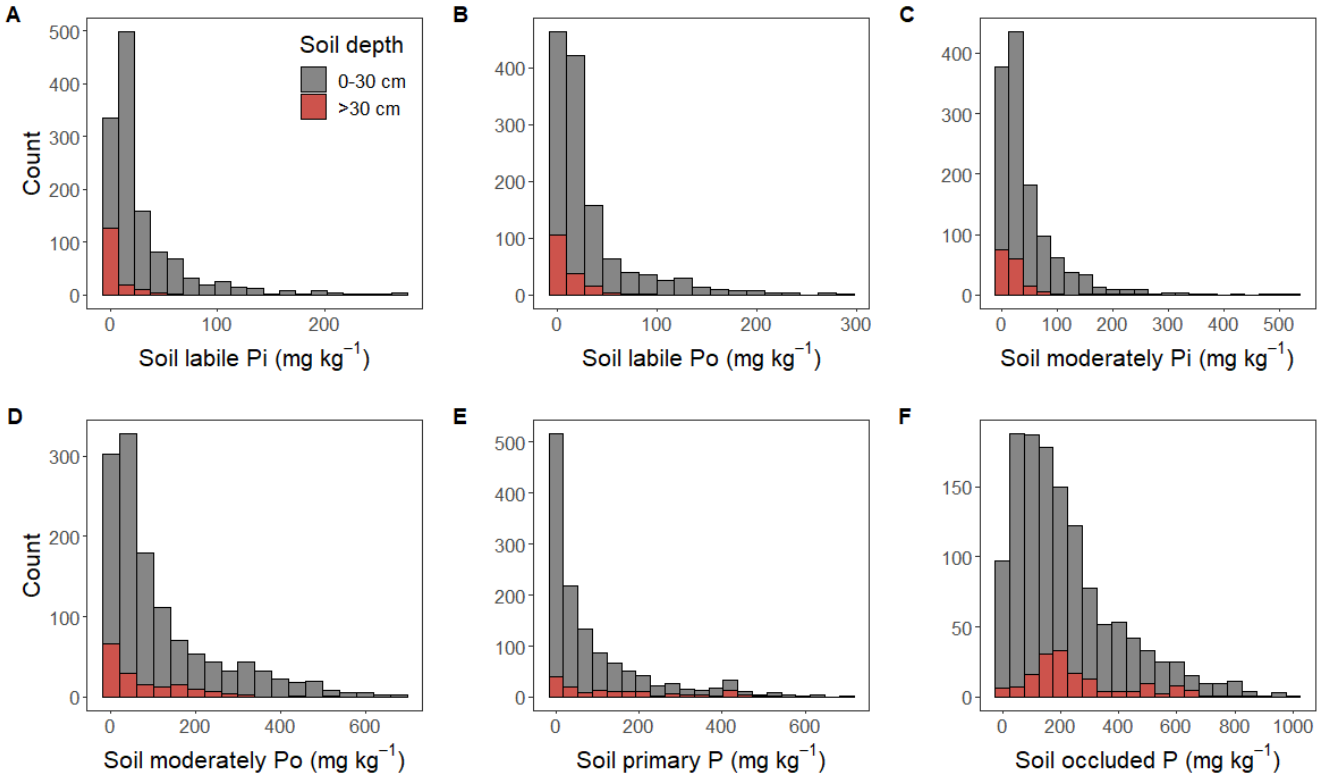

54

55

56 **Figure S6. Histogram plots of different P pool proportions.** We only included values falling in the interval between 1% and  
57 99% in these plots.

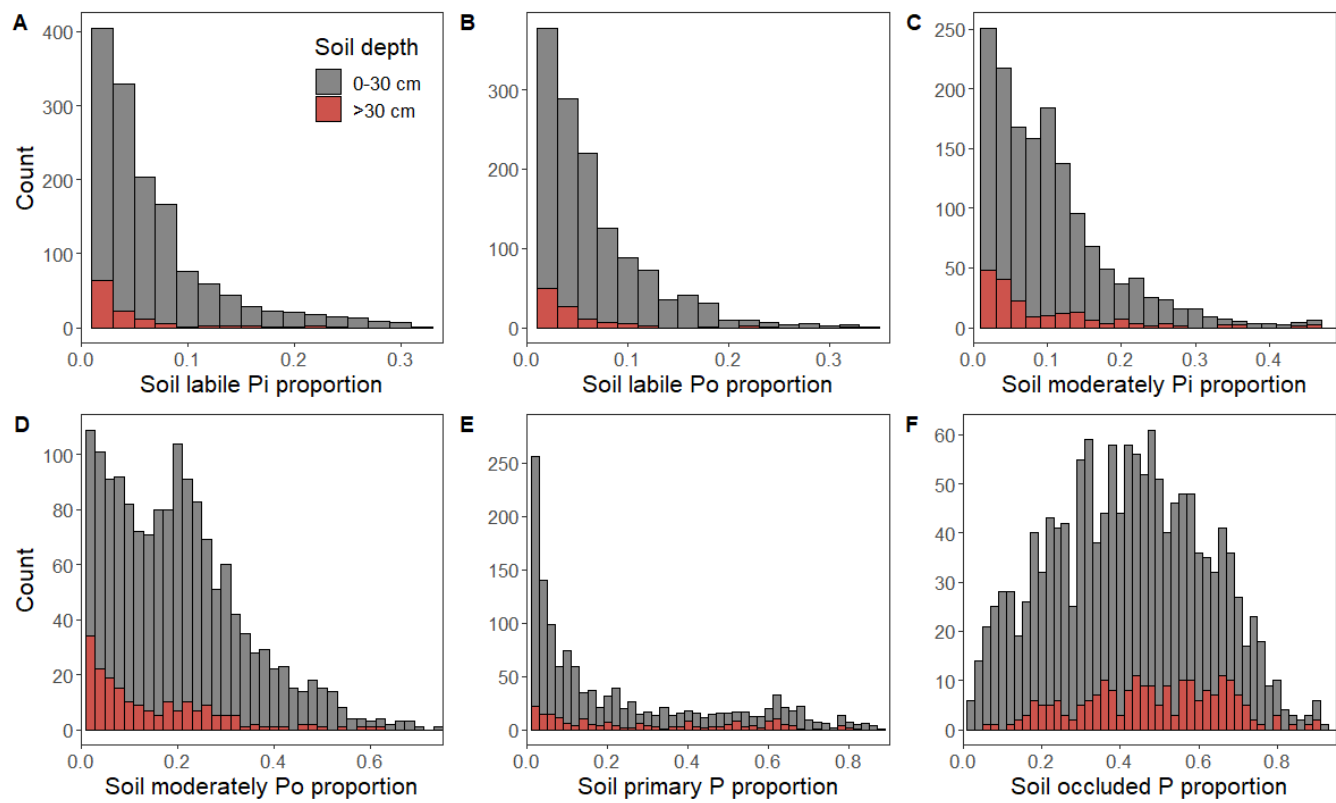

60 **Figure S7. Correlations between proportions predicted by random forest models and those calculated by predicted**  
 61 **concentration divided by total P concentration.**

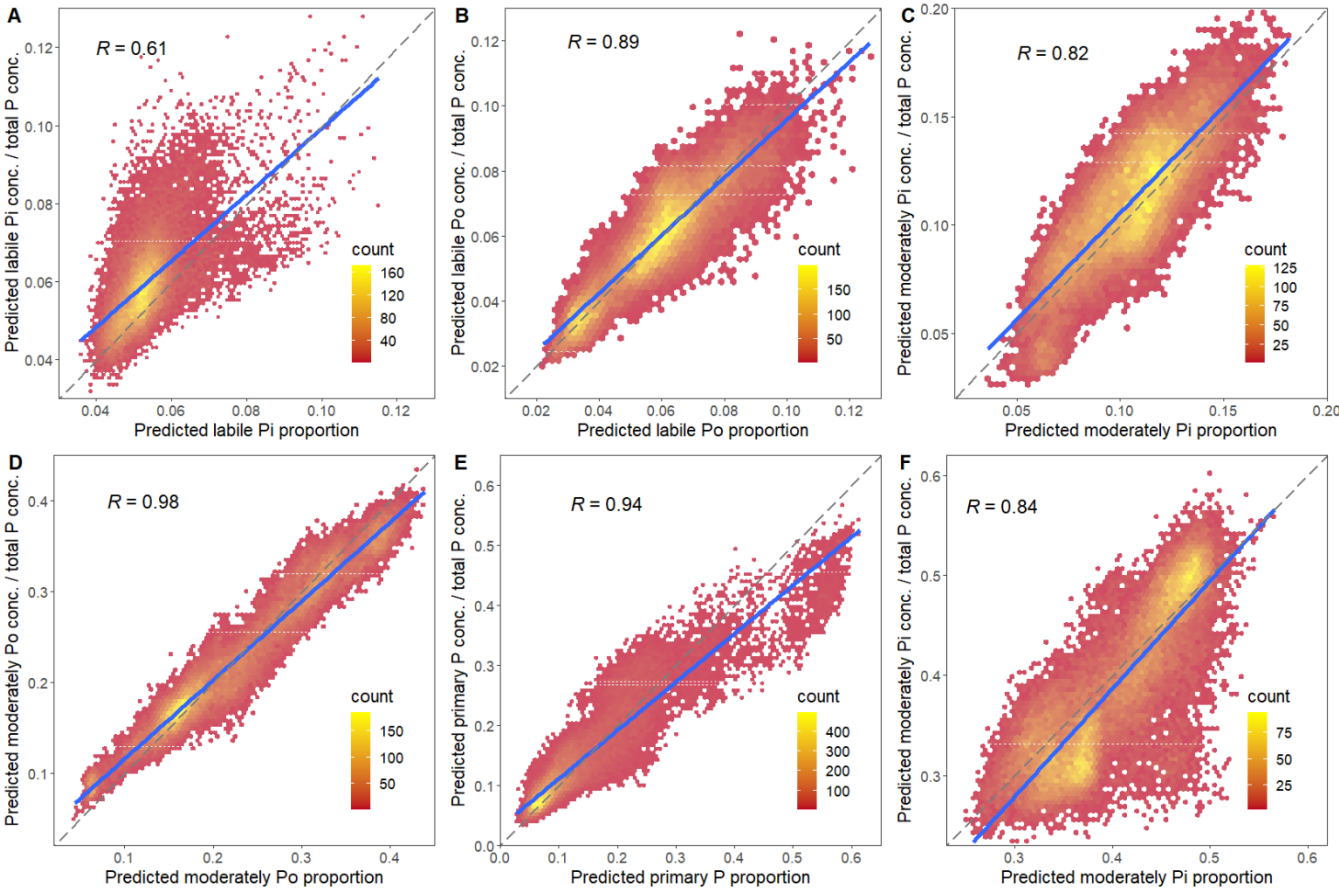

64 **Figure S8. Yang et al. (2013)’s predictions of different P pool concentrations.**

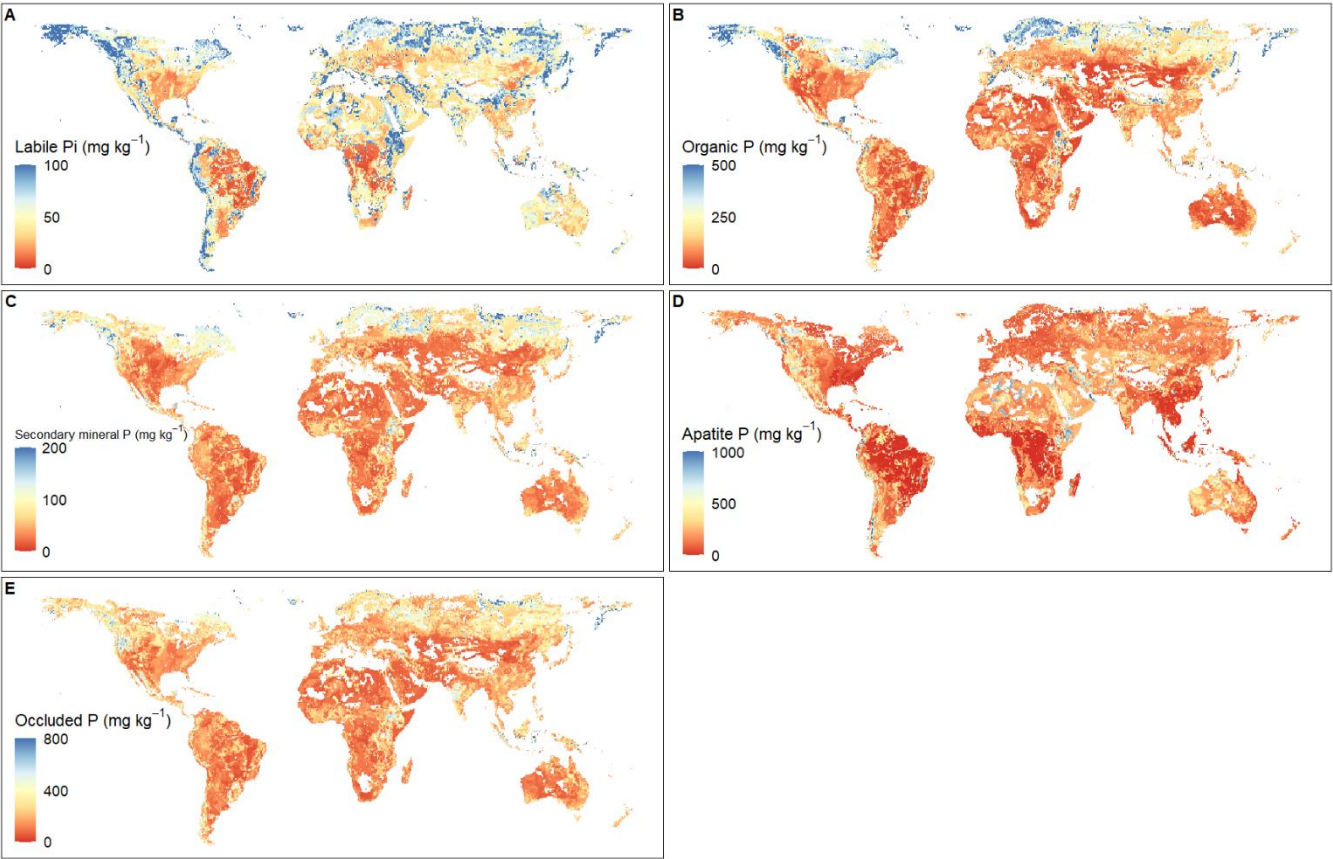

65  
66

67 **Figure S9. Relationship between our predicted P fraction concentrations and Yang et al.'s predictions.** Panels A, B, C,  
 68 D, E, and F depict correlations between both sets of predictions for soil labile Pi, organic P, primary mineral P, moderately  
 69 labile Pi, and occluded P, respectively. Dashed lines indicate the 1:1 line; blue lines indicate the regression line.

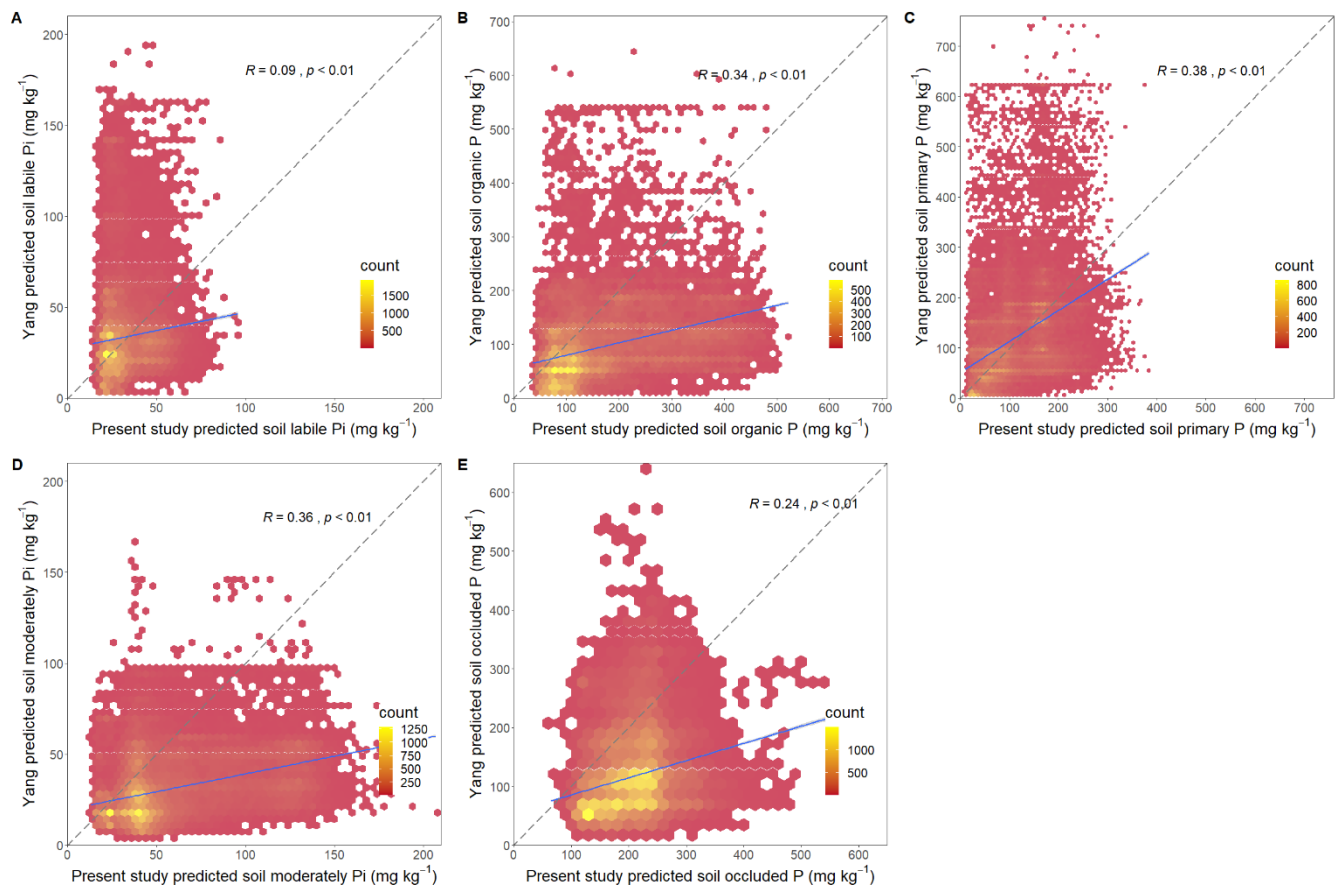

73 **Figure S10. Standard error of predicted different P pool concentrations.** Panels A, B, C, D, E, F indicate the standard error  
74 of the soil labile Pi, labile Po, moderately labile Pi, moderately labile Po, primary mineral P, and occluded P pools, respectively.

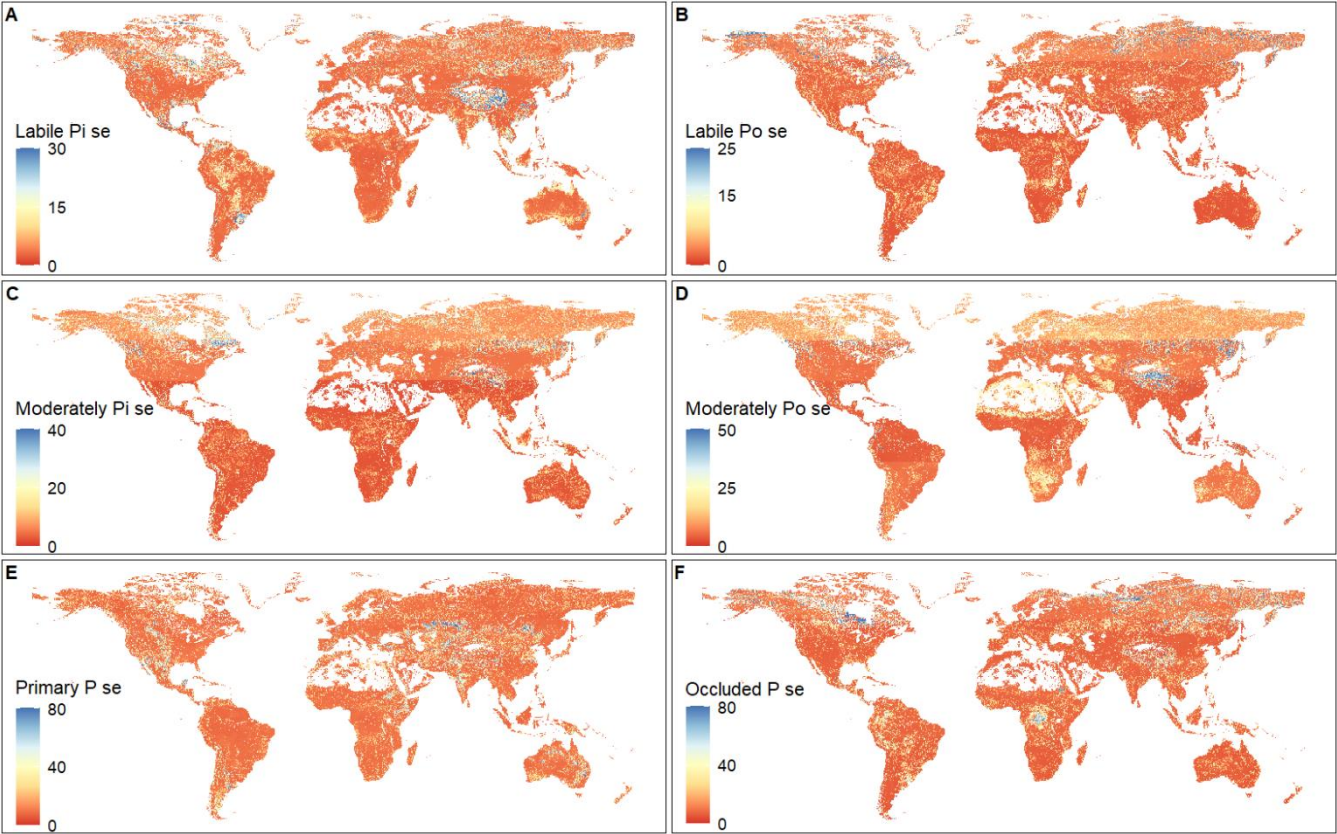

Supplement: Supplementary file 1 [file bg-2023-22-supplement.pdf]
